# Supplementary material for: Single Nucleotide Variants in the TLR1, TLR2 and TLR6 Genes: A Case–Control Study in a Colombian Population
Source: MDPI journal article supplement (doi:10.3390/tropicalmed8100473), 2023-10-16
Supplement: s1 [file s1]

**Table S5. Haplotype association with leprosy in case-control group (n=570, non-adjusted data).**

[illegible]
