# Supplementary material for: Single Nucleotide Variants in the TLR1, TLR2 and TLR6 Genes: A Case–Control Study in a Colombian Population
Source: MDPI journal article supplement (doi:10.3390/tropicalmed8100473), 2023-10-16
Supplement: s1 [file s1]

**Table S2. Distribution of SNV genotypes of TLR1 and TLR6 in leprosy cases and controls in inheritance models. (n=570, non-adjusted data).**

| Gene/SNV          | Model               | Genotype | Cases<br>n<br>(frequencies) | Controls<br>n<br>(frequencies) | OR<br>(95%CI)        | <i>P-value</i> |
|-------------------|---------------------|----------|-----------------------------|--------------------------------|----------------------|----------------|
| TLR1<br>rs5743618 | <b>Codominant</b>   | A/A      | 61 (53.5%)                  | 231 (50.7%)                    | 1                    | 0,85           |
|                   |                     | C/A      | 44 (38.6%)                  | 185 (40.6%)                    | 0.90<br>(0.58-1.39)  |                |
|                   |                     | C/C      | 9 (7.9%)                    | 40 (8.8%)                      | 0.85<br>(0.39-1.85)  |                |
|                   | <b>Dominant</b>     | A/A      | 61 (53.5%)                  | 231 (50.7%)                    | 1                    | 0,59           |
|                   |                     | C/A-C/C  | 53 (46.5%)                  | 225 (49.3%)                    | 0.89<br>(0.59-1.35)  |                |
|                   | <b>Recessive</b>    | A/A-C/A  | 105 (92.1%)                 | 416 (91.2%)                    | 1                    | 0,76           |
|                   |                     | C/C      | 9 (7.9%)                    | 40 (8.8%)                      | 0.89<br>(0.42-1.89)) |                |
|                   | <b>Overdominant</b> | A/A-C/C  | 70 (61.4%)                  | 271 (59.4%)                    | 1                    | 0,7            |
|                   |                     | C/A      | 44 (38.6%)                  | 185 (40.6%)                    | 0.92<br>(0.60-1.40)  |                |
|                   | <b>Log-additive</b> | ---      | ---                         | ---                            | 0.91<br>(0.66-1.26)  | 0,58           |
| TLR6<br>rs5743810 | <b>Codominant</b>   | G/G      | 83 (72.8%)                  | 296 (64.9%)                    | 1                    | 0,27           |
|                   |                     | A/G      | 28 (24.6%)                  | 146 (32%)                      | 0.68<br>(0.43-1.10)  |                |
|                   |                     | A/A      | 3 (2.6%)                    | 14 (3.1%)                      | 0.76<br>(0.21-2.72)  |                |
|                   | <b>Dominant</b>     | G/G      | 83 (72.8%)                  | 296 (64.9%)                    | 1                    | 0,11           |

|  |                     |         |             |             |                     |      |
|--|---------------------|---------|-------------|-------------|---------------------|------|
|  |                     | A/G-A/A | 31 (27.2%)  | 160 (35.1%) | 0.69<br>(0.44-1.09) |      |
|  | <b>Recessive</b>    | G/G-A/G | 111 (97.4%) | 442 (96.9%) | 1                   | 0,8  |
|  |                     | A/A     | 3 (2.6%)    | 14 (3.1%)   | 0.85<br>(0.24-3.02) |      |
|  | <b>Overdominant</b> | G/G-A/A | 86 (75.4%)  | 310 (68%)   | 1                   | 0,12 |
|  |                     | A/G     | 28 (24.6%)  | 146 (32%)   | 0.69<br>(0.43-1.11) |      |
|  | <b>Log-additive</b> | ---     | ---         | ---         | 0.74<br>(0.49-1.11) | 0,13 |
