# Supplementary material for: Single Nucleotide Variants in the TLR1, TLR2 and TLR6 Genes: A Case–Control Study in a Colombian Population
Source: MDPI journal article supplement (doi:10.3390/tropicalmed8100473), 2023-10-16
Supplement: s1 [file s1]

**Table S4. Genotypes distribution of TLR1 and TLR6 in leprosy cases and controls in inheritance models in the female subgroup. (n=283).**

| Gene/SNV          | Model        | Genotype | Cases<br>n<br>(Frequency) | Controls<br>n<br>(Frequency) | OR<br>(95%CI)       | <i>P-value</i> |
|-------------------|--------------|----------|---------------------------|------------------------------|---------------------|----------------|
| TLR1<br>rs5743618 | Codominant   | A/A      | 29 (51.8%)                | 124 (54.6%)                  | 1                   | 0.92           |
|                   |              | C/A      | 22 (39.3%)                | 85 (37.4%)                   | 1.11<br>(0.60-2.06) |                |
|                   |              | C/C      | 5 (8.9%)                  | 18 (7.9%)                    | 1.19<br>(0.41-3.46) |                |
|                   | Dominant     | A/A      | 29 (51.8%)                | 124 (54.6%)                  | 1                   | 0.7            |
|                   |              | C/A-C/C  | 27 (48.2%)                | 103 (45.4%)                  | 1.12<br>(0.62-2.01) |                |
|                   | Recessive    | A/A-C/A  | 51 (91.1%)                | 209 (92.1%)                  | 1                   | 0.81           |
|                   |              | C/C      | 5 (8.9%)                  | 18 (7.9%)                    | 1.14<br>(0.40-3.21) |                |
|                   | Overdominant | A/A-C/C  | 34 (60.7%)                | 142 (62.6%)                  | 1                   | 0.8            |
|                   |              | C/A      | 22 (39.3%)                | 85 (37.4%)                   | 1.08<br>(0.59-1.97) |                |
|                   | Log-additive | ---      | ---                       | ---                          | 1.10<br>(0.70-1.72) | 0.61           |
| TLR6<br>rs5743810 | Codominant   | G/G      | 38 (67.9%)                | 149 (65.6%)                  | 1                   | 0.9            |
|                   |              | A/G      | 17 (30.4%)                | 72 (31.7%)                   | 0.93<br>(0.49-1.75) |                |
|                   |              | A/A      | 1 (1.8%)                  | 6 (2.6%)                     | 0.65<br>(0.08-5.59) |                |
|                   | Dominant     | G/G      | 38 (67.9%)                | 149 (65.6%)                  | 1                   | 0.75           |
|                   |              | A/G-A/A  | 18 (32.1%)                | 78 (34.4%)                   | 0.90<br>(0.48-1.69) |                |
|                   | Recessive    | G/G-A/G  | 55 (98.2%)                | 221 (97.4%)                  | 1                   | 0.7            |
|                   |              | A/A      | 1 (1.8%)                  | 6 (2.6%)                     | 0.67<br>(0.08-5.68) |                |

|  |              |         |            |             |                     |     |
|--|--------------|---------|------------|-------------|---------------------|-----|
|  | Overdominant | G/G-A/A | 39 (69.6%) | 155 (68.3%) | 1                   | 084 |
|  |              | A/G     | 17 (30.4%) | 72 (31.7%)  | 0.94<br>(0.50-1.77) |     |
|  | Log-additive | ---     | ---        | ---         | 0.89<br>(0.51-1.57) | 0.7 |
