# Supplementary material for: Single Nucleotide Variants in the TLR1, TLR2 and TLR6 Genes: A Case–Control Study in a Colombian Population
Source: MDPI journal article supplement (doi:10.3390/tropicalmed8100473), 2023-10-16
Supplement: s1 [file s1]

**Table S3. Genotypes distribution of TLR1 and TLR6 in leprosy cases and controls in models of inheritance in the male subgroup. (n=287, non-adjusted data).**

| Gene/SNV          | Model        | Genotype | Cases<br>n<br>(frequency) | Controls<br>n<br>(frequency) | OR<br>(95%CI)           | <i>P-value</i> |
|-------------------|--------------|----------|---------------------------|------------------------------|-------------------------|----------------|
| TLR1<br>rs5743618 | Codominant   | A/A      | 32 (55.2%)                | 107 (46.7%)                  | 1                       | 0.49           |
|                   |              | C/A      | 22 (37.9%)                | 100 (43.7%)                  | 0.74 (0.40-1.35)        |                |
|                   |              | C/C      | 4 (6.9%)                  | 22 (9.6%)                    | 0.61 (0.20-1.89)        |                |
|                   | Dominant     | A/A      | 32 (55.2%)                | 107 (46.7%)                  | 1                       | 0.25           |
|                   |              | C/A-C/C  | 26 (44.8%)                | 122 (53.3%)                  | 0.71 (0.40-1.27)        |                |
|                   | Recessive    | A/A-C/A  | 54 (93.1%)                | 207 (90.4%)                  | 1                       | 0.51           |
|                   |              | C/C      | 4 (6.9%)                  | 22 (9.6%)                    | 0.70 (0.23-2.11)        |                |
|                   | Overdominant | A/A-C/C  | 36 (62.1%)                | 129 (56.3%)                  | 1                       | 0.43           |
|                   |              | C/A      | 22 (37.9%)                | 100 (43.7%)                  | 0.79 (0.44-1.42)        |                |
|                   | Log-additive | ---      | ---                       | ---                          | 0.76 (0.48-1.21)        | 0.24           |
| TLR6<br>rs5743810 | Codominant   | G/G      | 45 (77.6%)                | 147 (64.2%)                  | 1                       | 0.12           |
|                   |              | A/G      | 11 (19%)                  | 74 (32.3%)                   | <b>0.49 (0.24-0.99)</b> |                |
|                   |              | A/A      | 2 (3.5%)                  | 8 (3.5%)                     | 0.82 (0.17-3.99)        |                |
|                   | Dominant     | G/G      | 45 (77.6%)                | 147 (64.2%)                  | 1                       | 0.047          |
|                   |              | A/G-A/A  | 13 (22.4%)                | 82 (35.8%)                   | 0.52 (0.26-1.02)        |                |
|                   | Recessive    | G/G-A/G  | 56 (96.5%)                | 221 (96.5%)                  | 1                       | 0.99           |
|                   |              | A/A      | 2 (3.5%)                  | 8 (3.5%)                     | 0.99 (0.20-4.78)        |                |

|  |              |         |          |             |                  |       |
|--|--------------|---------|----------|-------------|------------------|-------|
|  | Overdominant | G/G-A/A | 47 (81%) | 155 (67.7%) | 1                | 0.04  |
|  |              | A/G     | 11 (19%) | 74 (32.3%)  | 0.49 (0.24-1.00) |       |
|  | Log-additive | ---     | ---      | ---         | 0.61 (0.34-1.10) | 0.085 |
